# Supplementary material for: Ultrafast oxidative desulfurization of diesel fuel catalyzed by a polyoxometalate-based catalyst immobilized on functionalized Y-SBA-15
Source: Royal Society of Chemistry journal article supplement (doi:10.1039/d2dt00911k), 2022-01-01
Supplement: d2dt00911k2.pdf [file d2dt00911k2.pdf]

## Supplementary Material

Ultrafast oxidative desulfurization of diesel fuel catalyzed by  
polyoxometalate-based catalyst immobilized on functionalized Y-SBA-

15

Zhe Zhang<sup>a</sup>, Jian Wang<sup>1, a</sup>, Ming Chen<sup>a</sup>, Tao Zhang<sup>b</sup>, Biao Yang<sup>a</sup>, Xuelian Peng<sup>a</sup>,  
Du Tian<sup>a</sup>, Linfeng Zhang<sup>a</sup>, Huadong Wu<sup>a, \*</sup>, Jia Guo<sup>a, \*</sup>

<sup>a</sup> *Engineering Research Center of Phosphorus Resources Development and  
Utilization of Ministry of Education,  
Key Laboratory of Green Chemical Process of Ministry of Education, Hubei Key  
Laboratory of Novel Chemical Reactor and Green Chemical Technology, Wuhan  
Institute of Technology, Wuhan 430073, P. R. China.*

<sup>b</sup> *School of Environment and Natural Resources, Renmin University of China, Beijing  
100872, P. R. China.*

<sup>1</sup> *This author has equal contribution as the first author.*

*\* Corresponding author: Tel: 86-027-87194980;*

*E-mail address: wuhuadong@wit.edu.cn;*

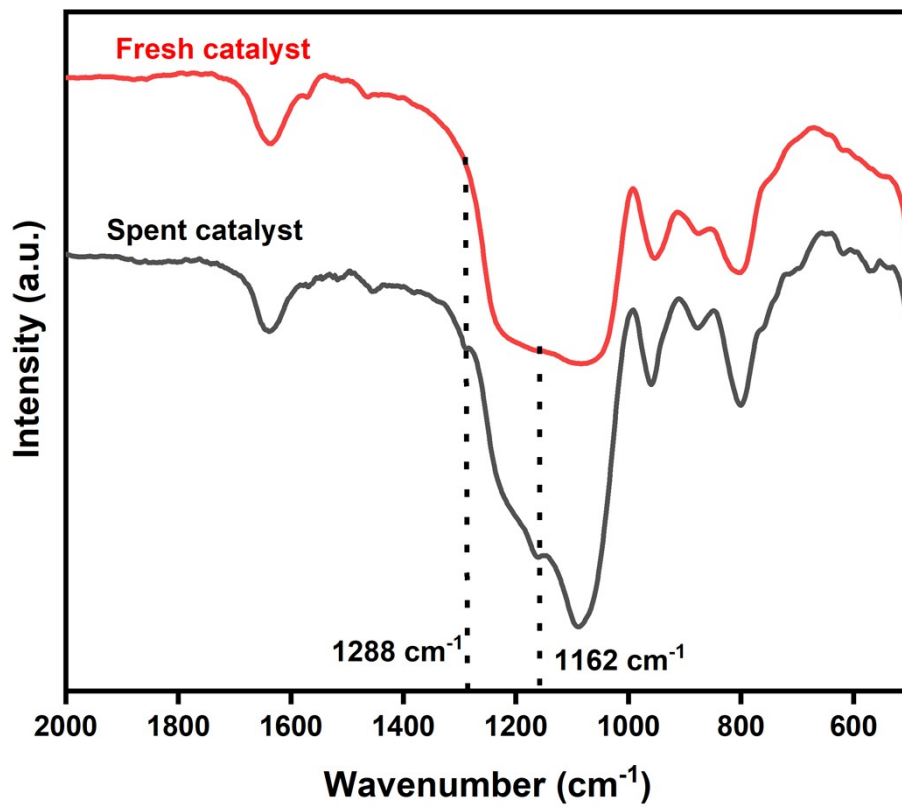

Fig.S1 The FT-IR spectra of fresh and spent catalyst.

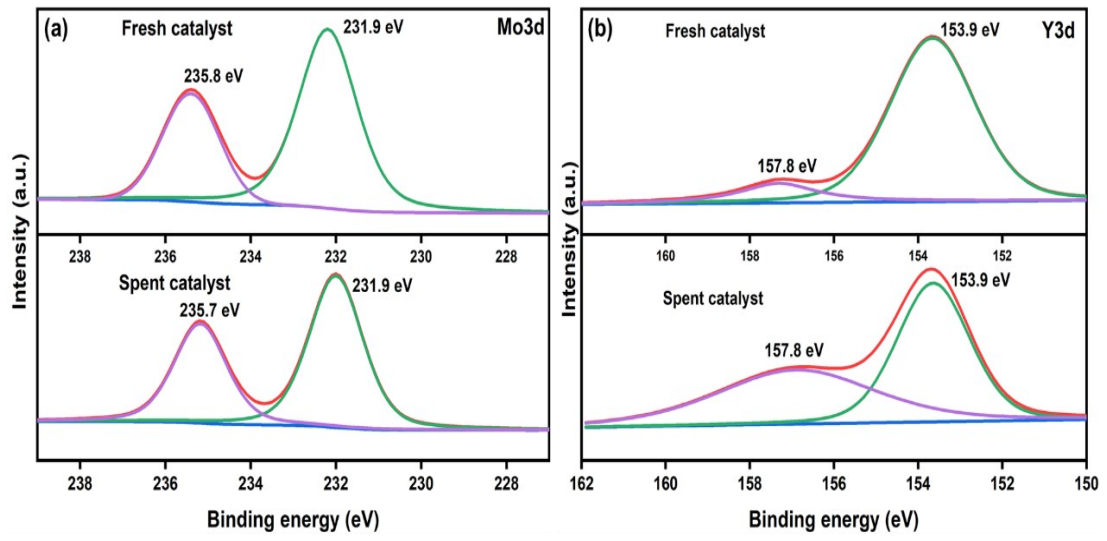

**Fig.S2** The XPS spectra of fresh and spent catalyst.
